# Supplementary material for: Spatiotemporal heterogeneity of social contact patterns related to infectious diseases in the Guangdong Province, China
Source: PubMed Central journal article supplement (PMC7160103; doi:10.1038/s41598-020-63383-z), 2020-04-15
Supplement: 41598_2020_63383_MOESM1_ESM.pdf [file 41598_2020_63383_MOESM1_ESM.pdf]

## Supplementary Information

Spatiotemporal heterogeneity of social contact patterns related to infectious diseases in the Guangdong Province, China

Yulin Huang<sup>1,2</sup>, Xiaoshuang Cai<sup>3</sup>, Bing Zhang<sup>2</sup>, Guanghu Zhu<sup>2</sup>, Tao Liu<sup>2</sup>, Pi Guo<sup>4</sup>, Jianpeng Xiao<sup>2</sup>, Xing Li<sup>2</sup>, Weilin Zeng<sup>2</sup>, Jianxiong Hu<sup>2</sup>, Wenjun Ma<sup>2,\*</sup>

<sup>1</sup> The First Affiliated Hospital of Jinan University, Guangzhou, China

<sup>2</sup> Guangdong Provincial Institute of Public Health, Guangdong Provincial Center for Disease Control and Prevention, Guangzhou, China

<sup>3</sup> School of Basic Medicine, Jinan University, Guangzhou, China

<sup>4</sup> Medical College, Shantou University, Shantou, China

**Figure S1.**

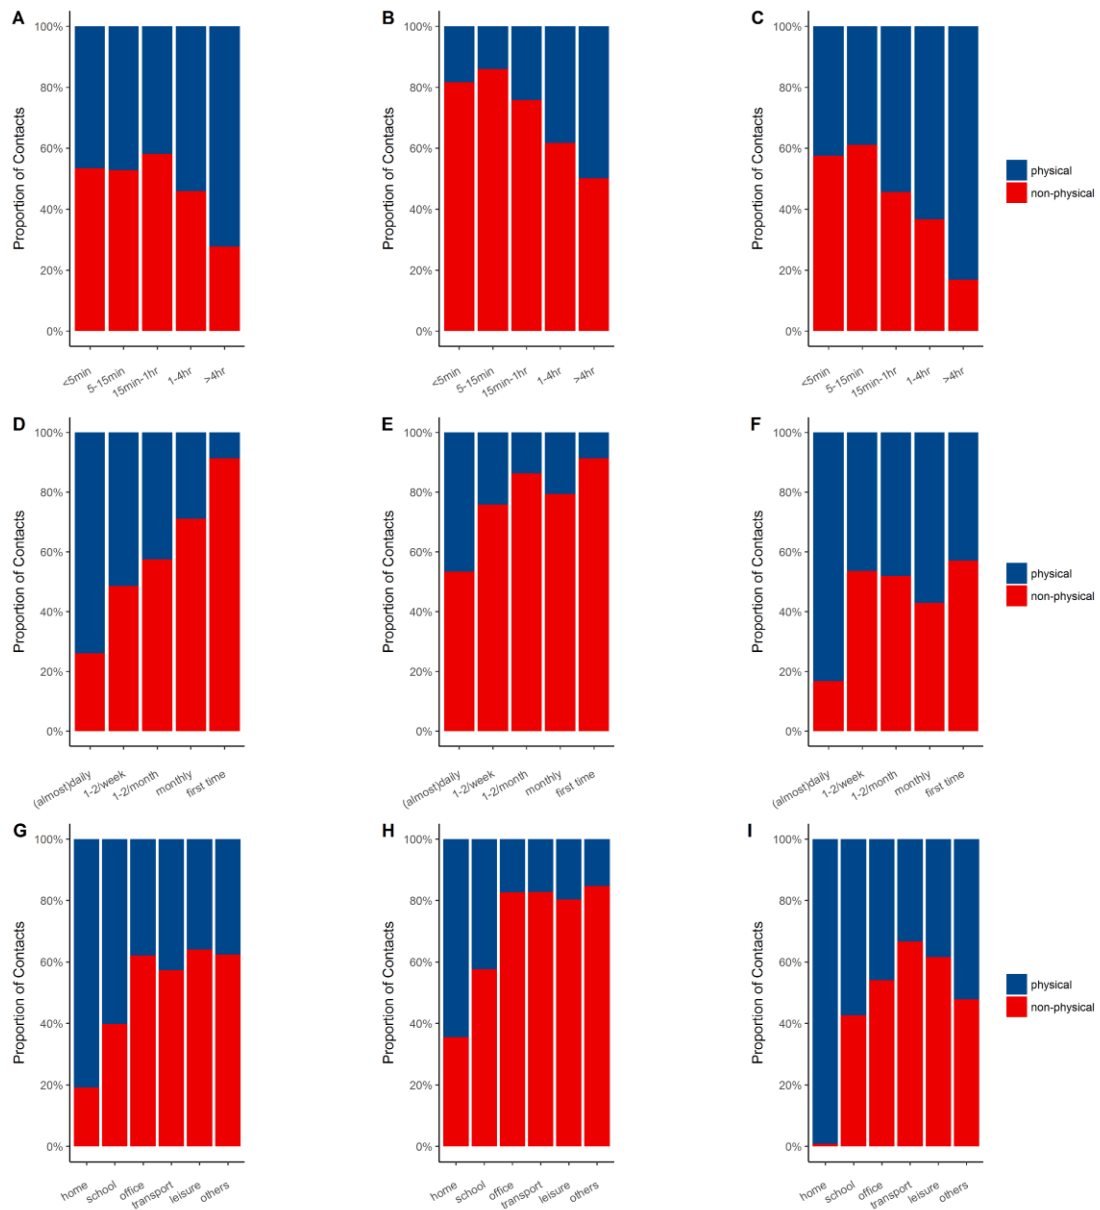

S1 Fig. Percentage of physical or non-physical contacts by duration, frequency, and location in Foshan (Panel: A, D, and G), Guangzhou (Panel: B, E, and H) and Zhuhai (Panel: C, F, and I) of Guangdong China. Abbreviations: hr, hours; min, minutes

**Figure S2.**

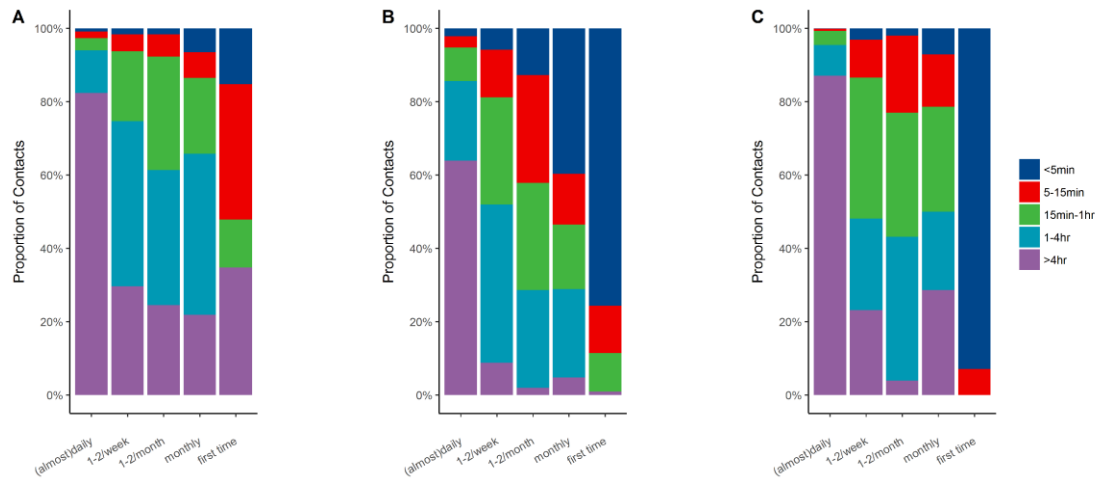

S2 Fig. Percentage of contact duration according to frequency in Foshan (A), Guangzhou (B) and Zhuhai(C) of Guangdong China. Abbreviations: hr, hours; min, minutes

**Figure S3.** Non-symmetrized contact intensity matrices of all contacts and physical contacts across the entire year, summer and winter.

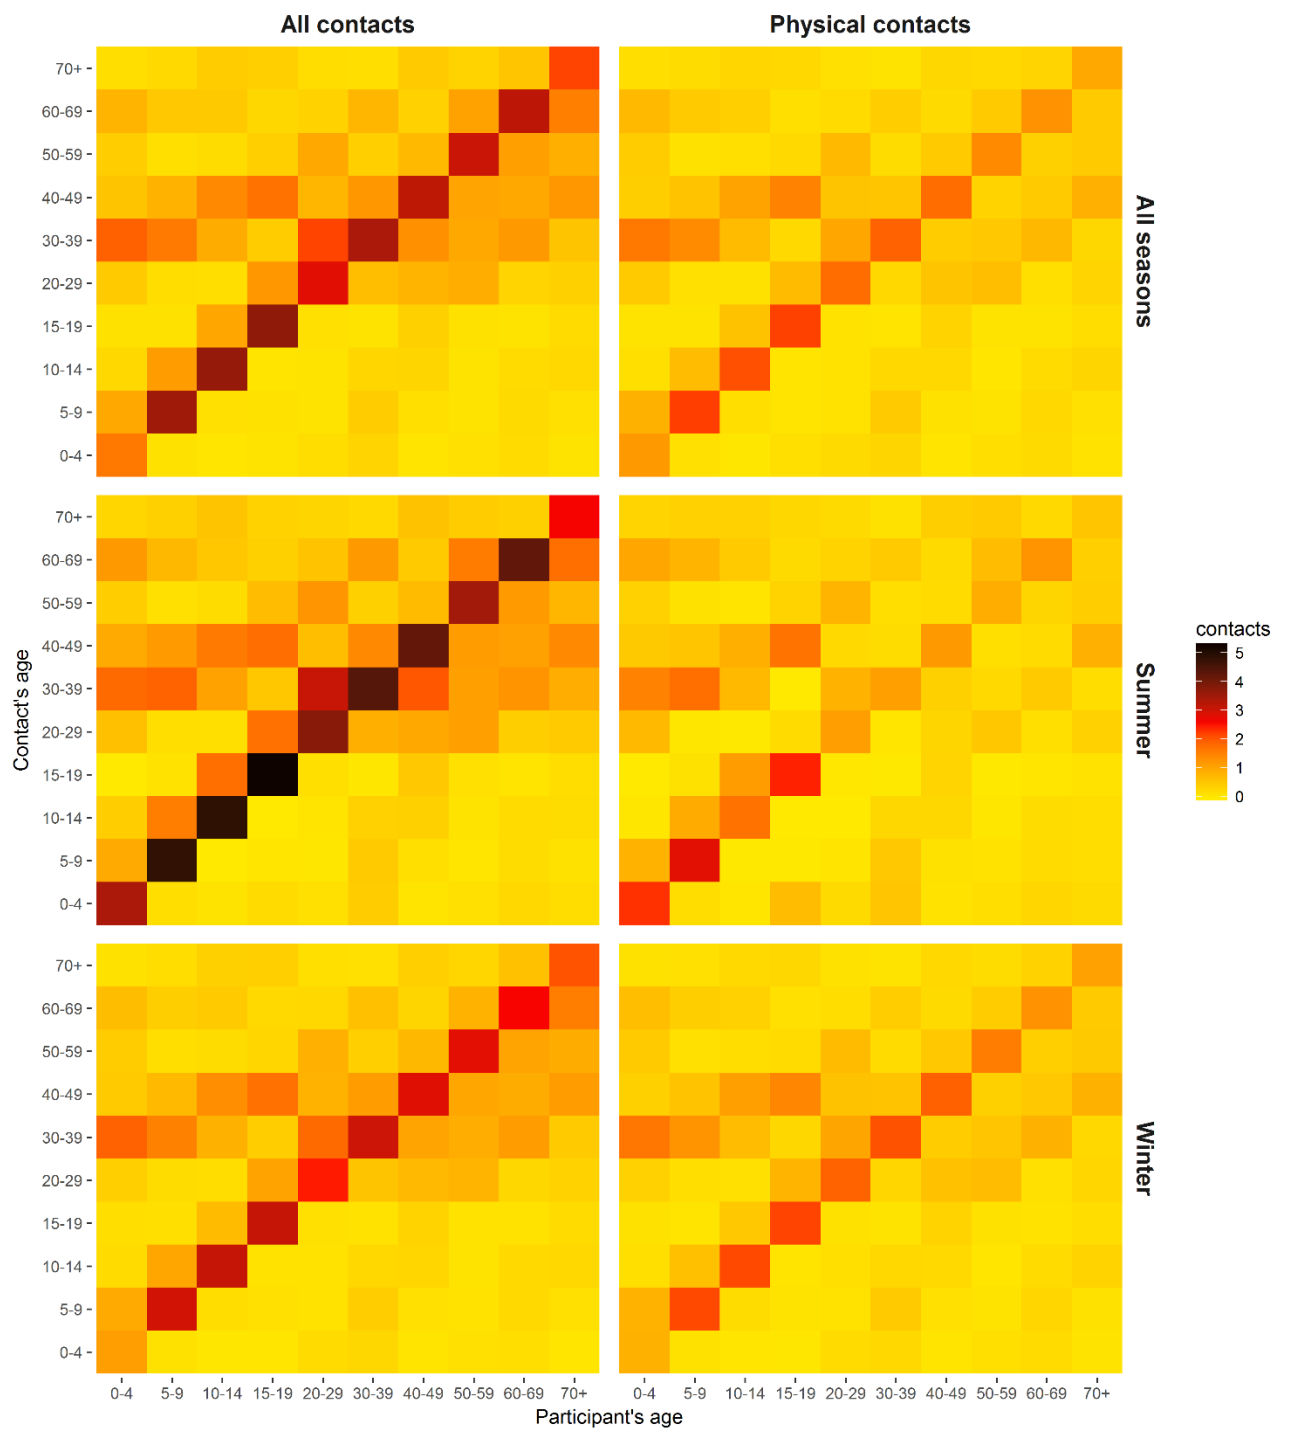

**Supplementary Table S1.** Comparison of age structure between census data (2015) and samples of Guangdong Province.

| Age | Sample |        | Census    |        | Ratio C/S        |
|-----|--------|--------|-----------|--------|------------------|
|     | N      | %      | N         | %      | Sampling weights |
| 0-  | 301    | 5.17%  | 5624736   | 5.39%  | 1.043            |
| 5-  | 310    | 5.33%  | 5167116   | 4.95%  | 0.929            |
| 10- | 246    | 4.23%  | 6812178   | 6.53%  | 1.544            |
| 15- | 205    | 3.52%  | 9989559   | 9.58%  | 2.720            |
| 20- | 682    | 11.72% | 22896757  | 21.95% | 1.873            |
| 30- | 1,002  | 17.22% | 18468133  | 17.70% | 1.028            |
| 40- | 979    | 16.83% | 15911579  | 15.25% | 0.906            |
| 50- | 822    | 14.13% | 9298010   | 8.91%  | 0.631            |
| 60- | 756    | 12.99% | 5234040   | 5.02%  | 0.386            |
| 70- | 515    | 8.85%  | 4918351   | 4.71%  | 0.533            |
| All | 5818   | 100%   | 104320459 | 100%   | 1.000            |

**Supplementary Text S1. Study questionnaire.**

Survey ID:

Survey Date:

**一、 Demographic data**

1.Name: \_\_\_\_\_

2.Gender: Male  Female

3.Age: \_\_\_\_\_ years

3.Household size (number of people living in your household) : \_\_\_\_\_

4.Occupation: \_\_\_\_\_

5 Address: \_\_\_\_\_ Postcode:

**二、 Social contacts**

| Relationship                                                                                        | Age (or Range)                                       | Gender                                            | Physical Contact                                  | Contact Frequency                                                                                                            | location of contact                                                                                                                                   | Total time spent with person during whole day                                                                                |
|-----------------------------------------------------------------------------------------------------|------------------------------------------------------|---------------------------------------------------|---------------------------------------------------|------------------------------------------------------------------------------------------------------------------------------|-------------------------------------------------------------------------------------------------------------------------------------------------------|------------------------------------------------------------------------------------------------------------------------------|
| colleagues/<br>Relatives/<br>classmates                                                             |                                                      | Male<br>Female                                    | Yes No                                            | almost every day<br>once or twice per week<br>once or twice per month<br>less than once per month<br>upon first meet         | home school office<br>Trans po-rtation<br>leisure areas<br>other areas                                                                                | less than 5mins<br>5-15 mins<br>15-60 mins<br>1-4 hrs<br>more than 4 hrs                                                     |
| <input type="checkbox"/> <input type="checkbox"/> <input type="checkbox"/> <input type="checkbox"/> | <input type="checkbox"/> <input type="checkbox"/> (- | <input type="checkbox"/> <input type="checkbox"/> | <input type="checkbox"/> <input type="checkbox"/> | <input type="checkbox"/> <input type="checkbox"/> <input type="checkbox"/> <input type="checkbox"/> <input type="checkbox"/> | <input type="checkbox"/> <input type="checkbox"/> <input type="checkbox"/> <input type="checkbox"/> <input type="checkbox"/> <input type="checkbox"/> | <input type="checkbox"/> <input type="checkbox"/> <input type="checkbox"/> <input type="checkbox"/> <input type="checkbox"/> |

|                                                                                                     |                                                                                                             |                                                   |                                                   |                                                                                                                              |                                                                                                                                                       |                                                                                                                              |
|-----------------------------------------------------------------------------------------------------|-------------------------------------------------------------------------------------------------------------|---------------------------------------------------|---------------------------------------------------|------------------------------------------------------------------------------------------------------------------------------|-------------------------------------------------------------------------------------------------------------------------------------------------------|------------------------------------------------------------------------------------------------------------------------------|
|                                                                                                     | <input type="checkbox"/> <input type="checkbox"/> )                                                         |                                                   |                                                   |                                                                                                                              |                                                                                                                                                       |                                                                                                                              |
| <input type="checkbox"/> <input type="checkbox"/> <input type="checkbox"/> <input type="checkbox"/> | <input type="checkbox"/> <input type="checkbox"/> (-<br><input type="checkbox"/> <input type="checkbox"/> ) | <input type="checkbox"/> <input type="checkbox"/> | <input type="checkbox"/> <input type="checkbox"/> | <input type="checkbox"/> <input type="checkbox"/> <input type="checkbox"/> <input type="checkbox"/> <input type="checkbox"/> | <input type="checkbox"/> <input type="checkbox"/> <input type="checkbox"/> <input type="checkbox"/> <input type="checkbox"/> <input type="checkbox"/> | <input type="checkbox"/> <input type="checkbox"/> <input type="checkbox"/> <input type="checkbox"/> <input type="checkbox"/> |
| <input type="checkbox"/> <input type="checkbox"/> <input type="checkbox"/> <input type="checkbox"/> | <input type="checkbox"/> <input type="checkbox"/> (-<br><input type="checkbox"/> <input type="checkbox"/> ) | <input type="checkbox"/> <input type="checkbox"/> | <input type="checkbox"/> <input type="checkbox"/> | <input type="checkbox"/> <input type="checkbox"/> <input type="checkbox"/> <input type="checkbox"/> <input type="checkbox"/> | <input type="checkbox"/> <input type="checkbox"/> <input type="checkbox"/> <input type="checkbox"/> <input type="checkbox"/> <input type="checkbox"/> | <input type="checkbox"/> <input type="checkbox"/> <input type="checkbox"/> <input type="checkbox"/> <input type="checkbox"/> |
| <input type="checkbox"/> <input type="checkbox"/> <input type="checkbox"/> <input type="checkbox"/> | <input type="checkbox"/> <input type="checkbox"/> (-<br><input type="checkbox"/> <input type="checkbox"/> ) | <input type="checkbox"/> <input type="checkbox"/> | <input type="checkbox"/> <input type="checkbox"/> | <input type="checkbox"/> <input type="checkbox"/> <input type="checkbox"/> <input type="checkbox"/> <input type="checkbox"/> | <input type="checkbox"/> <input type="checkbox"/> <input type="checkbox"/> <input type="checkbox"/> <input type="checkbox"/> <input type="checkbox"/> | <input type="checkbox"/> <input type="checkbox"/> <input type="checkbox"/> <input type="checkbox"/> <input type="checkbox"/> |
| <input type="checkbox"/> <input type="checkbox"/> <input type="checkbox"/> <input type="checkbox"/> | <input type="checkbox"/> <input type="checkbox"/> (-<br><input type="checkbox"/> <input type="checkbox"/> ) | <input type="checkbox"/> <input type="checkbox"/> | <input type="checkbox"/> <input type="checkbox"/> | <input type="checkbox"/> <input type="checkbox"/> <input type="checkbox"/> <input type="checkbox"/> <input type="checkbox"/> | <input type="checkbox"/> <input type="checkbox"/> <input type="checkbox"/> <input type="checkbox"/> <input type="checkbox"/> <input type="checkbox"/> | <input type="checkbox"/> <input type="checkbox"/> <input type="checkbox"/> <input type="checkbox"/> <input type="checkbox"/> |
| <input type="checkbox"/> <input type="checkbox"/> <input type="checkbox"/> <input type="checkbox"/> | <input type="checkbox"/> <input type="checkbox"/> (-<br><input type="checkbox"/> <input type="checkbox"/> ) | <input type="checkbox"/> <input type="checkbox"/> | <input type="checkbox"/> <input type="checkbox"/> | <input type="checkbox"/> <input type="checkbox"/> <input type="checkbox"/> <input type="checkbox"/> <input type="checkbox"/> | <input type="checkbox"/> <input type="checkbox"/> <input type="checkbox"/> <input type="checkbox"/> <input type="checkbox"/> <input type="checkbox"/> | <input type="checkbox"/> <input type="checkbox"/> <input type="checkbox"/> <input type="checkbox"/> <input type="checkbox"/> |
| <input type="checkbox"/> <input type="checkbox"/> <input type="checkbox"/> <input type="checkbox"/> | <input type="checkbox"/> <input type="checkbox"/> (-<br><input type="checkbox"/> <input type="checkbox"/> ) | <input type="checkbox"/> <input type="checkbox"/> | <input type="checkbox"/> <input type="checkbox"/> | <input type="checkbox"/> <input type="checkbox"/> <input type="checkbox"/> <input type="checkbox"/> <input type="checkbox"/> | <input type="checkbox"/> <input type="checkbox"/> <input type="checkbox"/> <input type="checkbox"/> <input type="checkbox"/> <input type="checkbox"/> | <input type="checkbox"/> <input type="checkbox"/> <input type="checkbox"/> <input type="checkbox"/> <input type="checkbox"/> |
| <input type="checkbox"/> <input type="checkbox"/> <input type="checkbox"/> <input type="checkbox"/> | <input type="checkbox"/> <input type="checkbox"/> (-<br><input type="checkbox"/> <input type="checkbox"/> ) | <input type="checkbox"/> <input type="checkbox"/> | <input type="checkbox"/> <input type="checkbox"/> | <input type="checkbox"/> <input type="checkbox"/> <input type="checkbox"/> <input type="checkbox"/> <input type="checkbox"/> | <input type="checkbox"/> <input type="checkbox"/> <input type="checkbox"/> <input type="checkbox"/> <input type="checkbox"/> <input type="checkbox"/> | <input type="checkbox"/> <input type="checkbox"/> <input type="checkbox"/> <input type="checkbox"/> <input type="checkbox"/> |
| <input type="checkbox"/> <input type="checkbox"/> <input type="checkbox"/> <input type="checkbox"/> | <input type="checkbox"/> <input type="checkbox"/> (-<br><input type="checkbox"/> <input type="checkbox"/> ) | <input type="checkbox"/> <input type="checkbox"/> | <input type="checkbox"/> <input type="checkbox"/> | <input type="checkbox"/> <input type="checkbox"/> <input type="checkbox"/> <input type="checkbox"/> <input type="checkbox"/> | <input type="checkbox"/> <input type="checkbox"/> <input type="checkbox"/> <input type="checkbox"/> <input type="checkbox"/> <input type="checkbox"/> | <input type="checkbox"/> <input type="checkbox"/> <input type="checkbox"/> <input type="checkbox"/> <input type="checkbox"/> |
| <input type="checkbox"/> <input type="checkbox"/> <input type="checkbox"/> <input type="checkbox"/> | <input type="checkbox"/> <input type="checkbox"/> (-<br><input type="checkbox"/> <input type="checkbox"/> ) | <input type="checkbox"/> <input type="checkbox"/> | <input type="checkbox"/> <input type="checkbox"/> | <input type="checkbox"/> <input type="checkbox"/> <input type="checkbox"/> <input type="checkbox"/> <input type="checkbox"/> | <input type="checkbox"/> <input type="checkbox"/> <input type="checkbox"/> <input type="checkbox"/> <input type="checkbox"/> <input type="checkbox"/> | <input type="checkbox"/> <input type="checkbox"/> <input type="checkbox"/> <input type="checkbox"/> <input type="checkbox"/> |
| <input type="checkbox"/> <input type="checkbox"/> <input type="checkbox"/> <input type="checkbox"/> | <input type="checkbox"/> <input type="checkbox"/> (-<br><input type="checkbox"/> <input type="checkbox"/> ) | <input type="checkbox"/> <input type="checkbox"/> | <input type="checkbox"/> <input type="checkbox"/> | <input type="checkbox"/> <input type="checkbox"/> <input type="checkbox"/> <input type="checkbox"/> <input type="checkbox"/> | <input type="checkbox"/> <input type="checkbox"/> <input type="checkbox"/> <input type="checkbox"/> <input type="checkbox"/> <input type="checkbox"/> | <input type="checkbox"/> <input type="checkbox"/> <input type="checkbox"/> <input type="checkbox"/> <input type="checkbox"/> |

We do ask you to include every contact you had, but if you were unable to include every single contact (for instance, because you work in a shop till and have a large number of contacts in a day), please could you indicate this?

I included every person I had contact with.       I did not include every person I had contact with.

If you did not include every person you had contact with, approximately how many people you left out did you have:

Physical contact with: \_\_\_\_\_ No physical contact with: \_\_\_\_\_

### Instructions:

1. A contact is defined as: ① EITHER a **two-way conversation** with three or more words in the physical presence of another person; ② OR physical **skin-to-skin contact** (for example a handshake, hug, kiss or contact sports).
2. The order in which you write down your contact persons is not important.
3. Contacts made exclusively by telephone or mobile phone should NOT be recorded.
4. If you contact the same person several times in the course of the day, only record him/her once, and record the total time you spent with that person over the entire day. So each person you meet during the day and have contact with should only have one line in the diary: one person, one line.◦
5. If you don't know the exact age, give an estimate of the age range (e.g. 40-45) and try to make it as narrow as possible.◦
6. Questionnaires for young children should be responded by a parent or guardian on their behalf.
